# Supplementary material
Source: PubMed Central journal article supplement (PMC8317046)
Supplement: NIHMS1716322-supplement-Supple_figs_S1-S7.pdf [file NIHMS1716322-supplement-Supple_figs_S1-S7.pdf]

## **Supplemental Information**

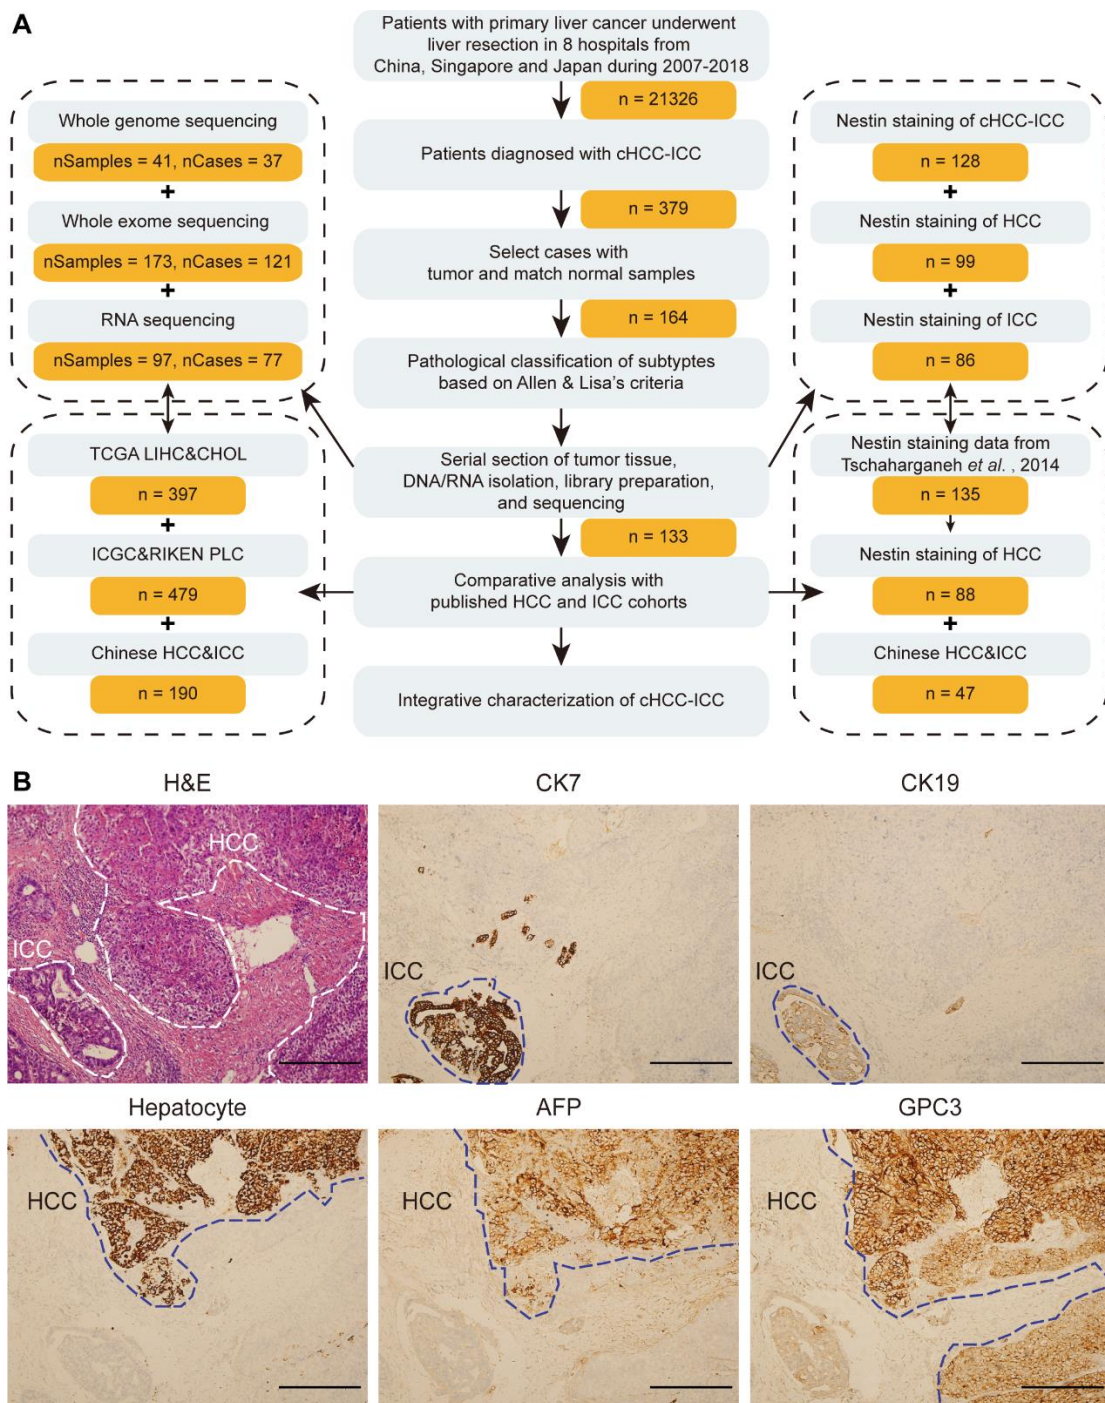

**Figure S1. Research strategy and pathological evidence of cHCC-ICC. Related to Figure 1.**

(A) Schematic diagram depicting research strategy, including case screening, multi-omics sequencing, IHC staining and comparative analysis with published datasets (data source indicated). TCGA, the Cancer Genome Atlas, LIHC, TCGA's designation for hepatocellular carcinoma, CHOL, TCGA's designation for cholangiocarcinoma, ICGC, International Cancer Genome Consortium.

(B) A set of diagnostic slides for a combined type cHCC-ICC case. Staining markers are indicated. The dashed line divides the HCC and ICC components. Scale bar = 400  $\mu$ m.

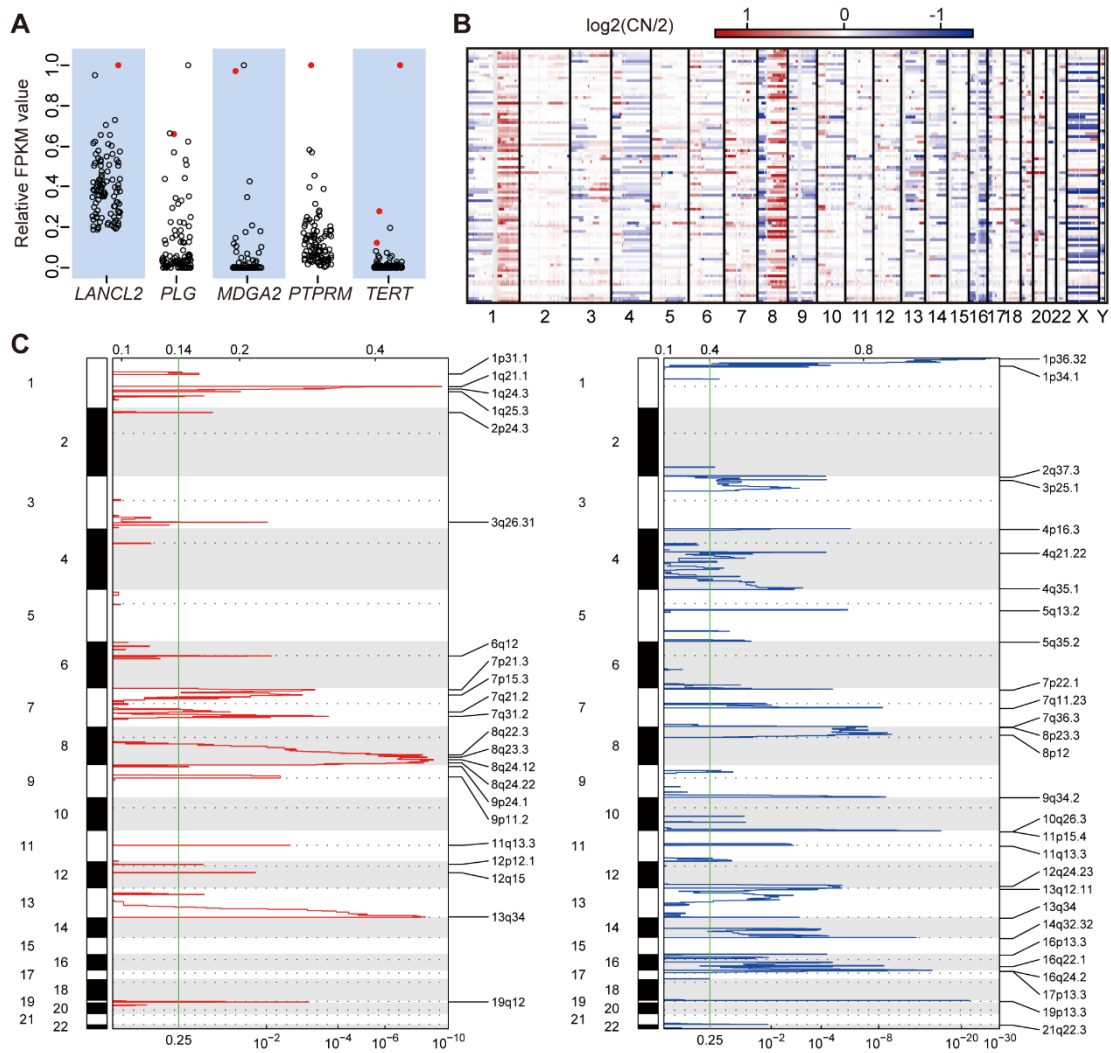

**Figure S2. Genomic alterations in cHCC-ICC. Related to Figure 2.**

(A) Expression level of genes with HBV integrated into promoter regions. Red denotes the presence of integration, black denotes the absence of integration.

(B) CNA landscape of cHCC-ICC. Colors in the heatmap represent  $\log_2(\text{CN}/2)$  values. Red for copy number gains and amplifications, blue for copy number loss and deletions.

(C) Focally amplified (red) and deleted (blue) genomic regions identified by GISTIC analysis. The genome is oriented vertically from top to bottom, and GISTIC q values at each locus are plotted from left to right on a log scale. The green line represents the significance threshold (q value = 0.25).

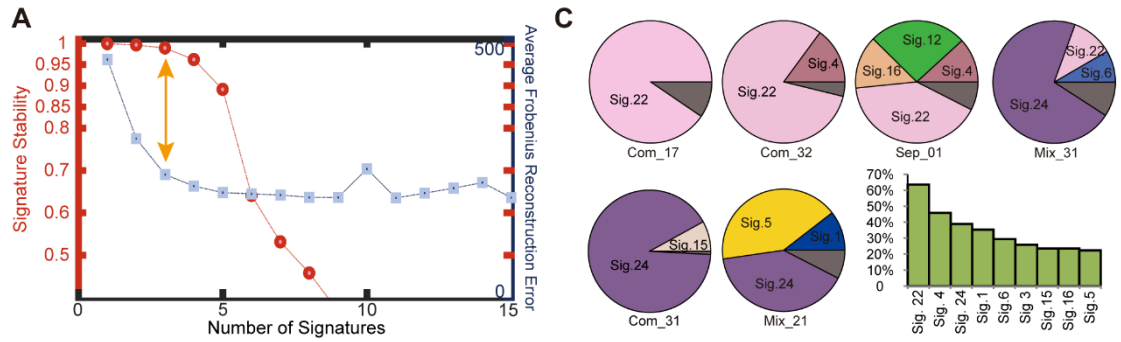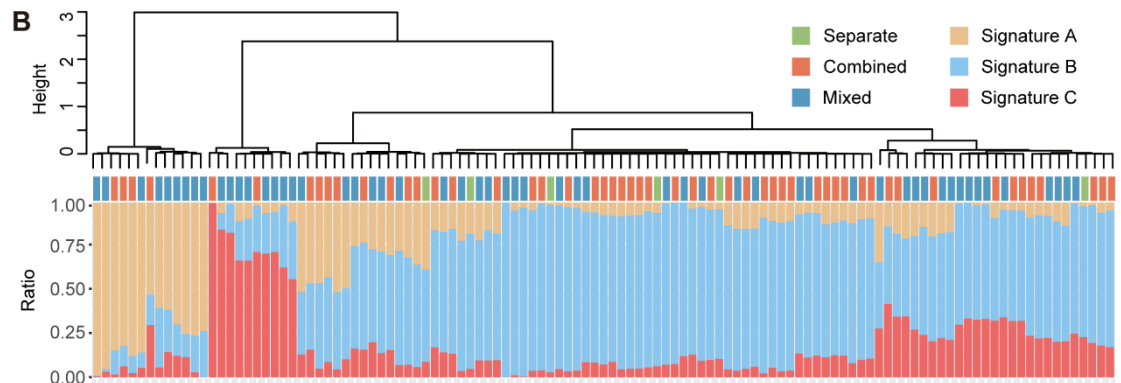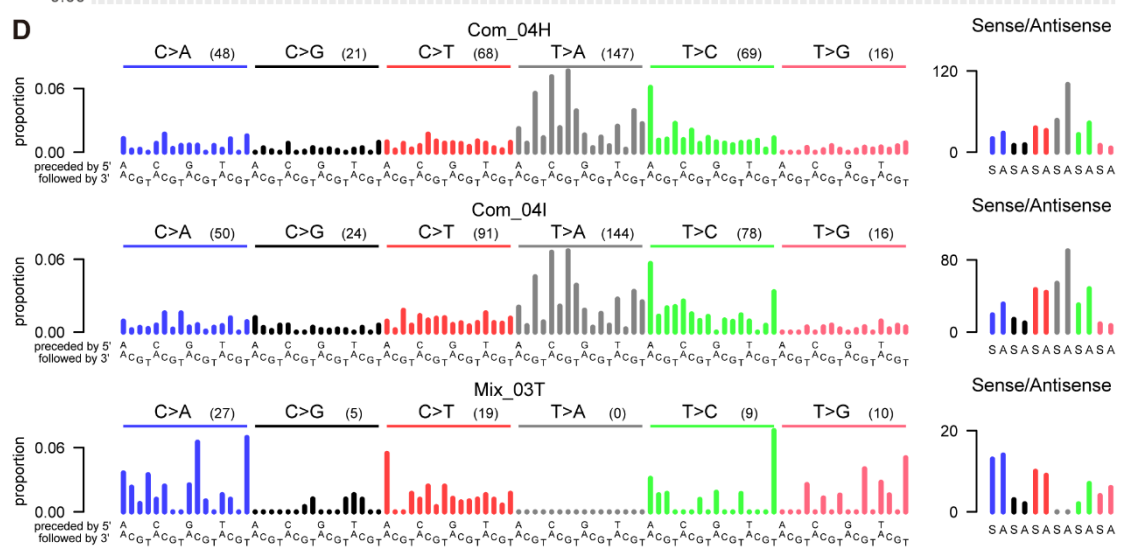

**Figure S3. Mutational signatures of cHCC-ICC. Related to Figure 2.**

(A) Stability and reconstruction error for the non-negative-matrix factorization analysis. The number of signatures was estimated to be three (indicated by yellow arrow) due to the high signature stability and relatively low reconstruction error.

(B) Clustering of the cHCC-ICC cases based on the three signatures.

(C) COSMIC signatures extracted by deconstructSigs in 6 cHCC-ICC cases. Signatures are indicated on the pie charts. Brown sectors indicate unknown signatures. The frequencies of extracted COSMIC signatures across all cHCC-ICC cases are indicated.

(D) Ninety-six substitution patterns of selected cases from the mSigAct analysis. The Y-axis indicates the frequency of the 96 substitution patterns.

(E) Hotspot mutation analysis for *TP53* across 3 PLCs by Mutation Mapper from cBioPortal. The percentages of *TP53* R249S mutations are indicated. HCC and ICC data are from the cBioPortal website.

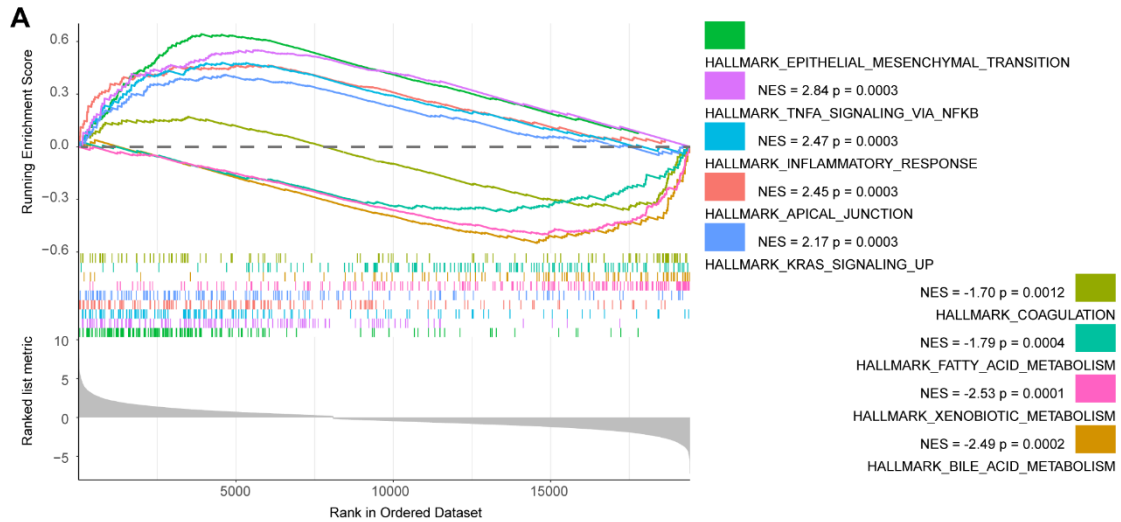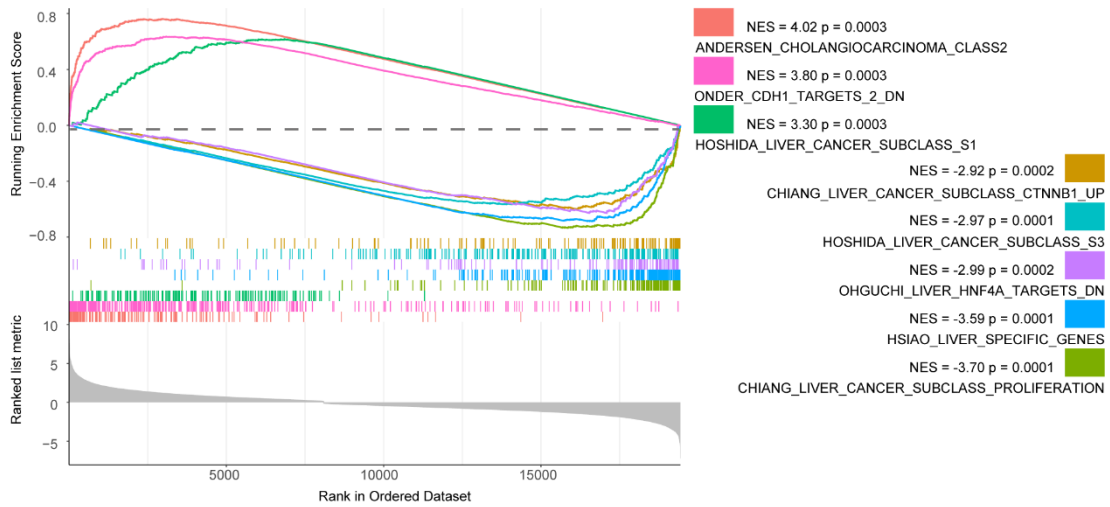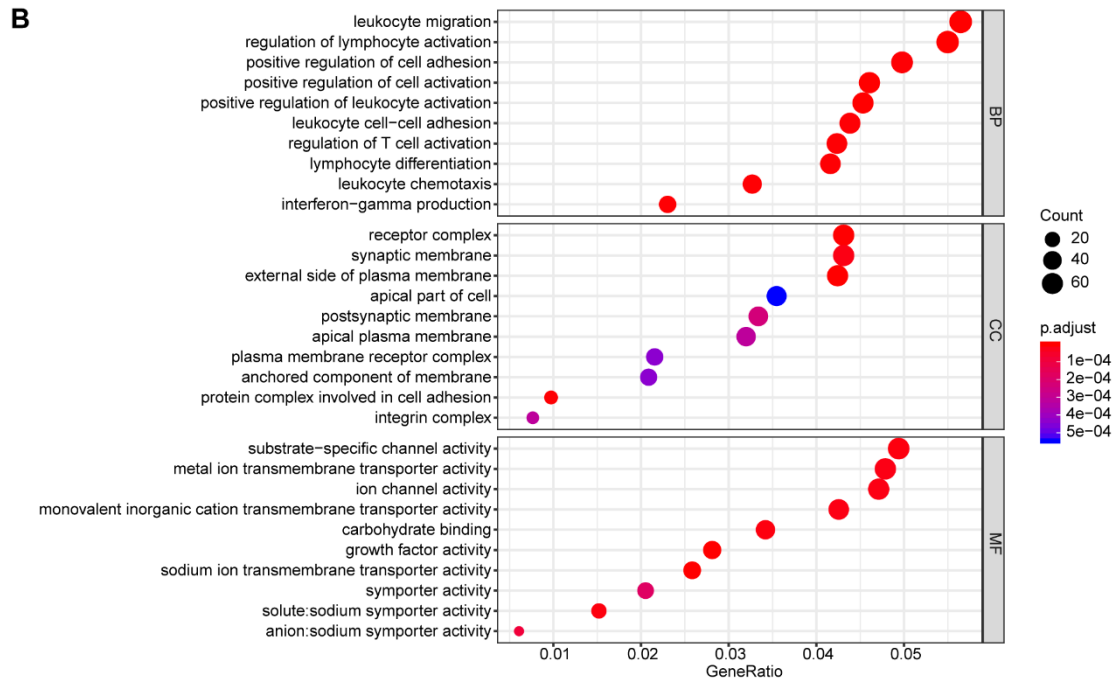

**Figure S4. Comparison of gene expression between clusters P1 and P2. Related to Figure 4.**

(A) GSEA analysis results comparing clusters P1 and P2 with H\_hallmark gene sets (upper graph) and C2\_curated gene sets (lower graph) from MSigDB. Normalized enrichment score (NES) and p values of each gene set are indicated.

(B) Gene ontology (GO) enrichment analysis of differentially expressed genes (fold change >1) between combined and mixed type cHCC-ICC.

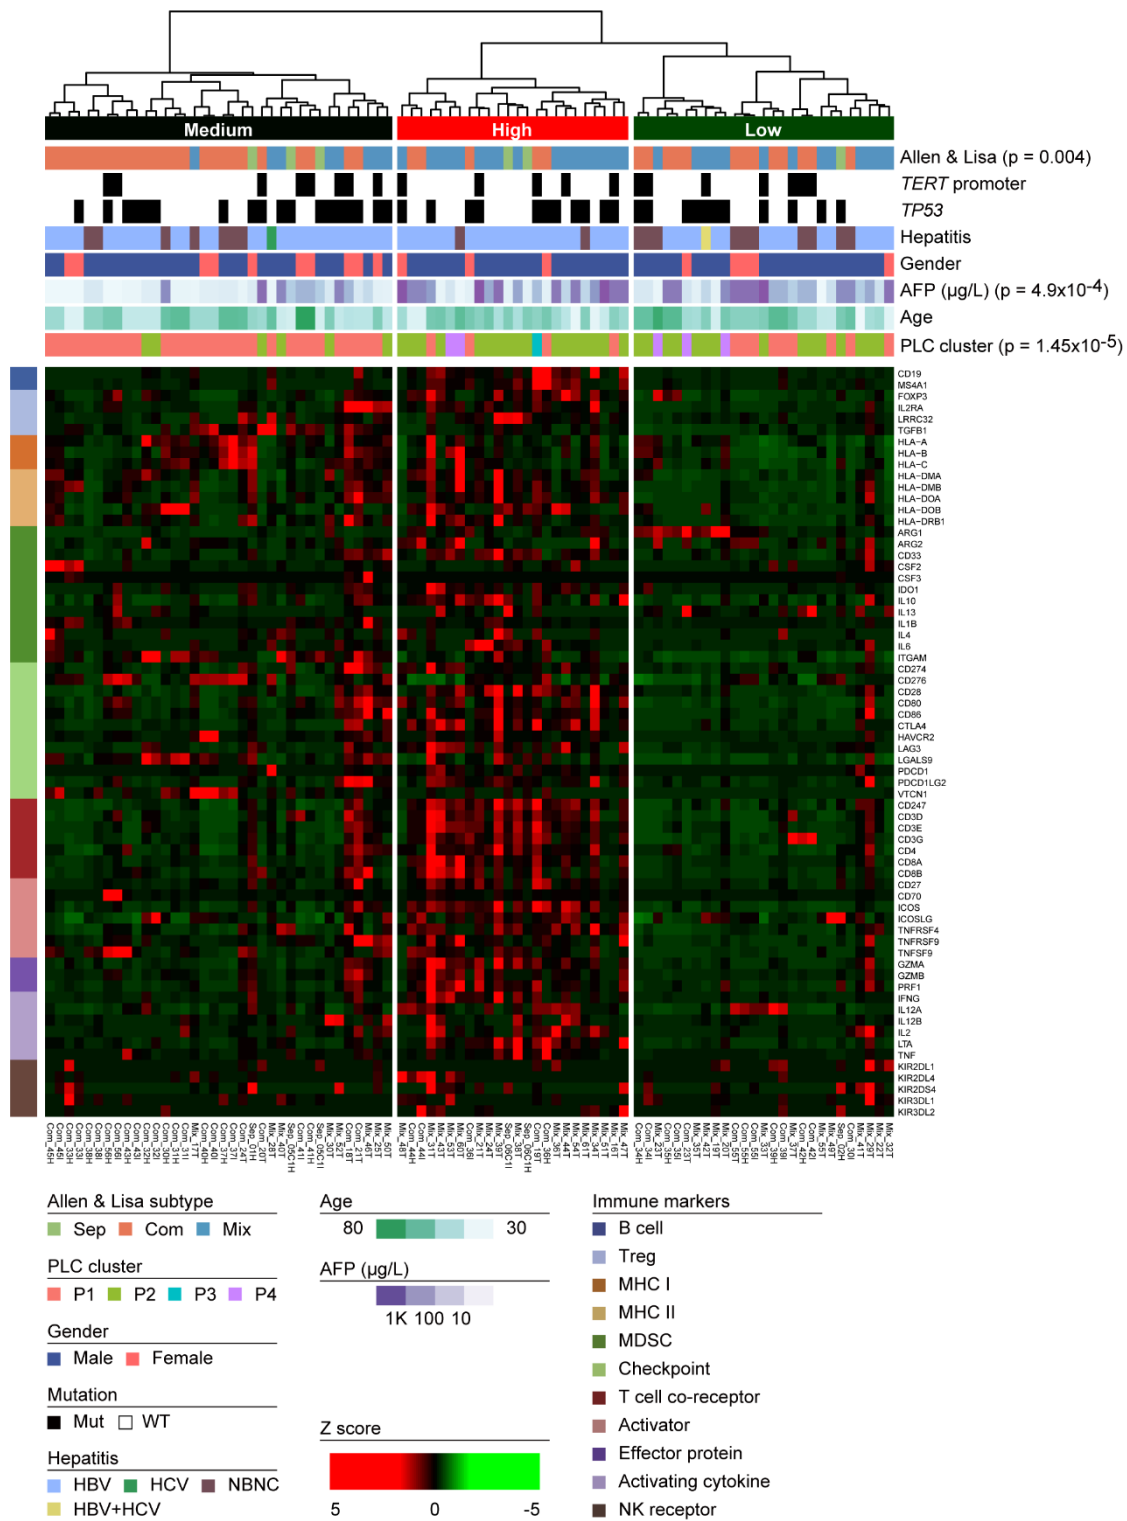

**Figure S5. Immune phenotype of cHCC-ICC. Related to Figure 4.**

Unsupervised clustering analysis of the gene expression levels of selected immune-related markers identified 3 immune clusters. Clinical and molecular features are annotated above the heatmap with details shown in the legend to the right of the heatmap. P values indicate significant non-random distributions for each attribute.



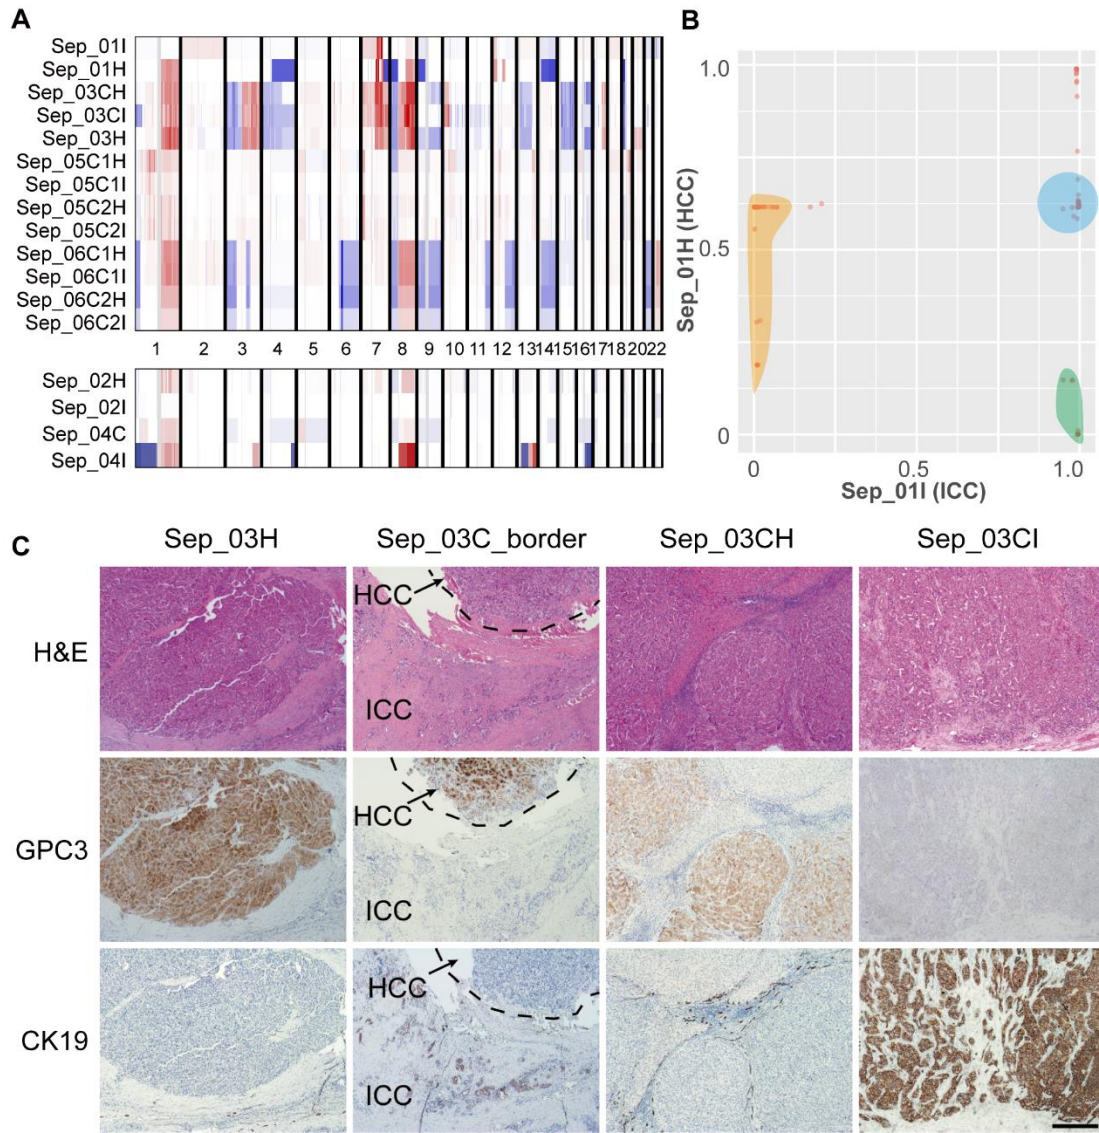

**Figure S6. Genomic analysis of separate type cHCC-ICC. Related to Figure 5.**

(A) CNA landscape of separate type cHCC-ICC. Colors in the heatmap represent  $\log_2(CN/2)$  values. Red for copy number gains and amplifications, blue for copy number loss and deletions. The upper panel shows samples from mono-clonal cases. The lower panel shows samples from multi-clonal cases.

(B) Pairwise cancer cell fraction plot of mutations in the two lesions from Sep\_01. Each point denotes a mutation: its X coordinate equals the CCF value of this mutation in Sep\_01I, its Y coordinate equals the CCF value of this mutation in Sep\_01H. The orange and green shades mark mutations private to Sep\_01H and Sep\_01I, respectively. The blue circular shade marks the subclone that spreads out from the primary (Sep\_01H) and later becomes the founder clone of the metastases (Sep\_01I).

(C) A set of pathological slides for Sep\_03. In the slides of Sep\_03C\_border, HCC and ICC components are indicated. Scale bar = 400  $\mu$ m.

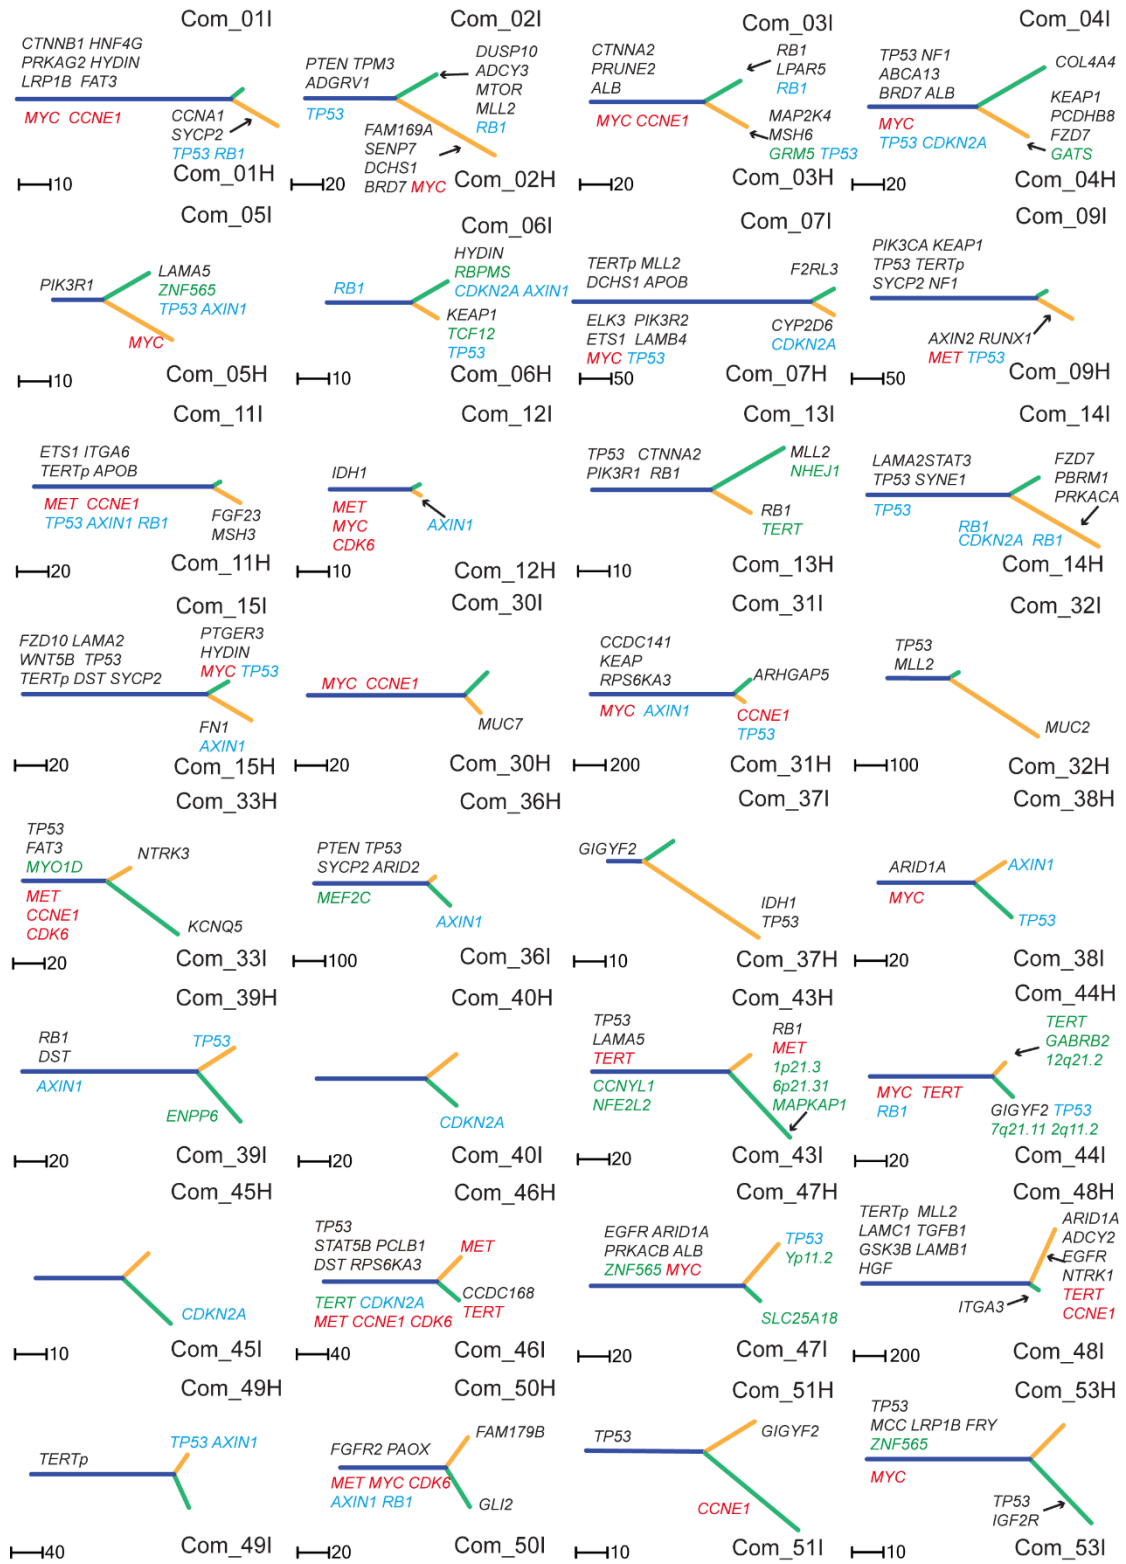

**Figure S7. Phylogenetic trees of combined type cHCC-ICC. Related to Figure 6.**

In the phylogenetic trees, the length of each line is proportional to the number of mutations. Scale bar of each tree is indicated. Blue lines denote mutations shared by an H-I pair. Orange and green lines denote mutations identified only in HCC or ICC components, respectively. Arrows indicate the acquisition of

potential driver events during tumor evolution. For the genes, black, green, red and blue denote somatic mutation, HBV integration, copy number gain and copy number loss, respectively.
